# Supplementary material for: Pyroclastic density currents explain far-reaching and diverse seafloor impacts of the 2022 Hunga Tonga Hunga Ha’apai eruption
Source: Research Square preprint supplement (doi:10.21203/rs.3.rs-2395332/v1), 2023-01-17
Supplement: Supplementary file 1 [file 024100ac9a3a7093841bb772.xlsx]

## Sheet: XRF Unk
XRD data from TAN2206 cores, on anhydrous basis with original LOI recorded. All data is an everage of 3 analyses.
Ident	Station	Site	Phase	SiO2	TiO2	Al2O3	Fe2O3	MnO	MgO	CaO	Na2O	K2O	P2O5	L.O.I.	S	Cl
31-2a	31	20	III	57.7546	0.574722	16.1046	10.1865	0.158544	3.58458	9.08408	1.8662	0.604449	0.0817493	0	173.15	915.605
70 1b	70	17	Ash	58.5412	0.534979	16.5266	9.35334	0.150698	3.79257	8.57724	1.67442	0.763538	0.0853957	0.457	97.6575	591.938
83-21	83	4	Ash	58.3317	0.610837	14.9852	10.867	0.17734	3.41544	8.88342	2.07882	0.555008	0.0952381	0	284.61	1055.25
90-2a	90	23	Ash	58.0447	0.629984	14.6919	11.0512	0.175732	3.43507	9.23755	2.08392	0.560354	0.089524	0	368.633	1035.59
90-2b	90	23	III	58.0911	0.616821	15.0285	10.8181	0.17231	3.50365	9.23234	1.87044	0.58186	0.0849066	0.10325	237.902	1072.59
90-2c	90	23	II	58.1958	0.626367	15.0792	10.8206	0.172334	3.43673	9.02764	1.95864	0.586598	0.0961092	0	257.793	1022.83
90-2d	90	23	I	58.136	0.609413	15.4605	10.5091	0.168913	3.59355	8.94909	1.86798	0.619349	0.0861127	0	277.417	902.847
90-2e	90	23	Seafloor	58.2903	0.624085	15.1438	10.6271	0.169244	3.27204	8.99106	2.13141	0.645241	0.105777	5.436	471.663	666.96
96-1a	96	31	Ash	57.9246	0.626129	14.826	11.1049	0.183257	3.51243	9.23668	1.90384	0.58286	0.0992644	1.60475	404.482	1226.98
Washing experiments conducted on the same sample
Ident	Station	Site	Phase	SiO2	TiO2	Al2O3	Fe2O3	MnO	MgO	CaO	Na2O	K2O	P2O5	L.O.I.	S	Cl
90-1a	90	23	Ash	56.0855	0.614814	14.4086	11.1663	0.195779	3.70262	9.65842	3.46734	0.587336	0.113346	1.56767	940.88	14043.8
90-1b	90	23	Ash	57.0722	0.613497	14.5375	11.148	0.183032	3.54879	9.60241	2.59974	0.586381	0.108464	1.416	420.803	1992.43
90-1c	90	23	Ash	57.8272	0.608495	14.7384	10.9664	0.18154	3.47952	9.42327	2.12301	0.551344	0.100856	0.882	441.983	925.627
90-1d	90	23	Ash	57.7233	0.632326	14.715	11.0859	0.191716	3.56861	9.55216	1.86166	0.565057	0.104267	0.648	529.637	1161.43

## Sheet: XRF Stds
Data for international standards BHVO and BCR-2, and internal standard TP-1 run together with the unknowns, on an anhydrous basis.
BHVO	SiO2	TiO2	Al2O3	Fe2O3	MnO	MgO	CaO	Na2O	K2O	P2O5	LOI
1	49.6332	2.72655	13.3651	12.4529	0.16855	7.20801	11.5011	2.12175	0.525481	0.297442	0
2	49.5151	2.74095	13.3683	12.4481	0.168217	7.20364	11.5377	2.20661	0.514546	0.296853	0
3	49.5858	2.74478	13.4045	12.4963	0.169678	7.16638	11.568	2.03613	0.528995	0.299431	0
4	49.4199	2.72682	13.3366	12.4641	0.168567	7.20873	11.5518	2.30045	0.525533	0.297471	0
5	49.5005	2.7297	13.2925	12.4122	0.168134	7.26931	11.4628	2.35387	0.524182	0.286816	0
6	49.6502	2.74835	13.5119	12.5025	0.169898	7.23566	11.5831	1.76894	0.539676	0.289826	0
7	49.4527	2.75622	13.3134	12.4776	0.169154	7.18408	11.5224	2.30846	0.527363	0.288557	0
8	49.5822	2.73577	13.3108	12.4353	0.169121	7.25229	11.5201	2.16872	0.527258	0.298448	0
9	49.5057	2.72835	13.3452	12.3962	0.168051	7.26572	11.467	2.32305	0.514037	0.286675	0
average	49.5384	2.7375	13.3609	12.4539	0.168819	7.22154	11.5238	2.17644	0.52523	0.293502	0
2sd%	0.319353	0.781124	0.990948	0.575304	0.801645	1.00294	0.724184	17.0525	2.92554	3.66488	0
Reference	49.8651	2.72809	13.4906	12.2914		7.22494	11.392	2.21845	0.519636	0.269811	-0.07
dev	-0.326716	0.00940965	-0.129636	0.162509	0.168819	-0.00340734	0.131741	-0.0420044	0.00559385	0.0236911	0.07
%dev	0.655199	0.344917	0.960939	1.32213		0.0471607	1.15643	1.89342	1.07649	8.78063	0
BCR-2	SiO2	TiO2	Al2O3	Fe2O3	MnO	MgO	CaO	Na2O	K2O	P2O5	LOI
1	54.0443	2.34406	13.4306	14.0543	0.191147	3.44064	7.1831	3.07847	1.86117	0.372233	0.565
2	54.332	2.28745	13.5324	14.0081	0.192308	3.42105	7.16599	2.89474	1.81174	0.354251	1.164
3	54.1389	2.27114	13.4774	13.846	0.189262	3.56609	7.11226	3.23737	1.79301	0.368563	0
4	53.989	2.27797	13.4671	13.9388	0.190667	3.50226	7.12494	3.3718	1.77622	0.361264	0.312
5	54.0979	2.28554	13.5119	13.9549	0.191301	3.56424	7.11841	3.11116	1.80226	0.362465	0.648
6	54.1402	2.27937	13.3838	13.9486	0.191629	3.50983	7.15078	3.23752	1.79526	0.363086	0.845
7	54.1912	2.29348	13.4971	13.9943	0.192815	3.47067	7.1646	3.04445	1.78608	0.365334	1.445
8	54.05	2.26	13.4	13.85	0.19	3.54	7.08	3.49	1.78	0.36	0
9	54.0038	2.31614	13.4712	13.8672	0.188063	3.50391	7.1167	3.35544	1.81134	0.366228	0
average	54.1097	2.29057	13.4635	13.9402	0.190799	3.50208	7.1352	3.20233	1.8019	0.363714	0.553222
2sd%	0.395548	2.21647	0.741891	1.05421	1.56826	2.91121	0.921836	11.6962	2.83294	2.85945	0
Reference	54.2791	2.26748	13.5447	13.8457		3.60189	7.14357	3.17046	1.79593	0.351159	0.33
dev	-0.169446	0.0230922	-0.0811985	0.0945482	0.190799	-0.0998086	-0.00837624	0.0318648	0.00596976	0.012555	0.223222
%dev	0.312175	1.01841	0.599485	0.682871		2.77101	0.117256	1.00505	0.332406	3.5753
TP-1	SiO2	TiO2	Al2O3	Fe2O3	MnO	MgO	CaO	Na2O	K2O	P2O5	LOI
1	74.0851	0.319555	13.5553	2.43274	0.0927739	0.340171	1.65962	4.64901	2.83476	0.0309246	2.867
2	74.0904	0.298047	13.6177	2.42549	0.0924974	0.277492	1.62384	4.72765	2.80576	0.04111	2.585
3	74.0981	0.298078	13.6191	2.42574	0.0925069	0.277521	1.62401	4.72813	2.80604	0.0308356	2.599
4	74.5497	0.295105	13.6359	2.41172	0.0915844	0.305281	1.62817	4.29429	2.77806	0.010176	1.622
5	74.0658	0.31652	13.6921	2.41985	0.091893	0.2961	1.65407	4.59465	2.82826	0.0408413	1.94
6	74.3996	0.296372	13.6229	2.41185	0.0919775	0.286152	1.62494	4.48646	2.74911	0.0306592	2.034
7	74.3005	0.293998	13.6659	2.40268	0.0912409	0.253447	1.60178	4.6026	2.7575	0.0304136	1.246
8	74.3366	0.294865	13.5638	2.40976	0.0915099	0.284698	1.62684	4.59583	2.7758	0.0203355	1.553
9	74.4473	0.291399	13.6254	2.39148	0.0904341	0.271302	1.60772	4.5217	2.73312	0.0200965	0.371
average	72.7933	0.294444	13.3522	2.36667	0.09	0.282222	1.59556	4.48667	2.73	0.0277778	1.86856
2sd%	1.9794	5.99038	1.89139	0.597555	3.27103e-14	16.1513	1.78496	5.25077	1.59667	69.9714	83.4837
Reference	73.78	0.29	13.95	2.41	0.09	0.3	1.68	4.66	2.82		0.02
dev	-0.986667	0.00444444	-0.597778	-0.0433333	0	-0.0177778	-0.0844444	-0.173333	-0.09	0.0277778	1.84856
%dev	1.33731	1.53257	4.28515	1.79806	0	5.92593	5.02646	3.7196	3.19149

## Sheet: EDS
Qualitative EDS data of glass shards in TAN2206 water and ash samples.
Ident	Location	Station	SiO2	TiO2	Al2O3	Fe2O3	MgO	CaO	Na2O	K2O	L.O.I.
Spectrum 1	Tongatapu Ash	Ash 1	58.6987	0.774684	15.2453	11.0885	4.15832	7.76529	2.84826	0.53144	86.1284
Spectrum 4	Tongatapu Ash	Ash 2-1	57.6505	0.565697	14.5037	12.6357	4.22592	9.1308	2.00855	0.544664	97.3063
Spectrum 10	Tongatapu Ash	Ash 3-1	58.5188	0.518653	14.9602	11.7951	4.17601	8.45453	2.22125	0.536822	96.484
Spectrum 12	Tongatapu Ash	Ash 4-1	59.9332	0.633964	15.3324	9.73274	4.41126	7.88283	2.45594	0.592441	89.4592
Spectrum 19	Tongatapu Ash	Ash 4-1	57.6269	0.574399	14.6787	12.3233	5.53128	7.90476	1.97263	0.622174	92.9281
Spectrum 23	NW Caldera midwater plume	St14 1	64.5616	0.862242	12.7511	12.3822	1.55247	6.80956	1.49866	0.822352	102.532
Spectrum 24	NW Caldera midwater plume	St14 1	59.3422	0.594725	14.9183	11.1093	3.79048	8.28994	2.24739	0.454722	95.3616
Spectrum 89	NW Caldera midwater plume	St14 11-1	57.9138	0.628816	14.8576	12.5757	4.3928	8.45401	1.91957	0.517144	95.4969
Spectrum 119	Site 20; St 27; Depth 1573	CTD5 3	62.8152	0.734516	14.2053	10.97	3.03005	7.16242	1.55802	0.623226	90.8384
Spectrum 126	Ncal; St32; midwater plume	CTD6 1	72.2604	0.385624	14.5797	4.69021	0.876164	4.49772	2.34447	0.835394	90.8377
Spectrum 130	Ncal; St32; midwater plume	CTD 6 2	58.6907	0.60382	15.3878	11.4666	4.29529	8.38877	1.78397	0.531408	88.4003
Spectrum 132	Ncal; St32; midwater plume	CTD 6 2	57.0165	0.582681	15.1152	12.5176	4.4281	8.48236	2.36939	0.407189	88.7446
Spectrum 137	Site 17; St. 72; Depth 1350	CTD10 4	64.7713	0.641482	13.623	10.9047	2.16094	6.42712	1.84305	0.720571	93.6114
Spectrum 139	Site 17; St. 72; Depth 1350	CTD10 4	62.2276	0.669842	14.1115	11.4004	2.89166	7.1117	2.01044	0.718645	87.1578
Spectrum 140	Site 17; St. 72; Depth 1350	CTD10 4	59.6727	0.571722	15.2983	10.7193	3.88936	8.49734	1.93456	0.490258	93.3633
Spectrum 144	Site 17; St. 72; Depth 1350	CTD10 4	57.7132	0.652396	14.8654	12.2688	4.11989	8.69143	2.4188	0.498817	86.9318
Spectrum 147	Site 17; St. 72; Depth 1350	CTD10 4	58.5493	0.597356	14.7157	11.847	3.74418	9.01926	1.86376	0.503253	100.526
Spectrum 148	Site 17; St. 72; Depth 1350	CTD10 4	58.4871	0.557678	15.9805	10.8344	4.19458	8.54493	2.04289	0.442979	89.7322
Spectrum 149	Site 17; St. 72; Depth 1350	CTD10 4	59.4651	0.625808	15.3575	10.8021	3.92251	8.35524	1.93848	0.615094	95.956
Spectrum 151	Site 17; St. 72; Depth 1350	CTD10 4	60.4442	0.577881	15.5819	9.92202	4.16926	7.63066	2.04861	0.619215	89.4816
Spectrum 156	Site 17; St. 72; Depth 1350	CTD10 4	58.7518	0.624625	15.2695	11.1386	3.94959	8.84883	2.01894	0.513697	96.1378
Spectrum 157	Site 17; St. 72; Depth 1350	CTD10 4	60.5949	0.582047	14.767	10.759	3.85715	7.69774	2.27326	0.546396	85.9754
Spectrum 159	Site 17; St. 72; Depth 1350	CTD10 4	58.1928	0.678722	15.1383	11.754	4.08262	8.75879	1.96879	0.603219	95.848
Spectrum 160	Site 17; St. 72; Depth 1350	CTD10 4	62.5916	0.691676	13.3798	12.2311	2.20739	6.59581	2.76516	0.762348	91.6414
Spectrum 162	Site 17; St. 72; Depth 1350	CTD10 4	59.2596	0.787529	13.9186	13.5139	2.93561	8.64272	1.64396	0.65162	101.668
Spectrum 165	Site 17; St. 72; Depth 1350	CTD10 4	59.0869	0.68221	15.0065	11.6329	3.76545	8.47829	1.92943	0.583383	92.913
Spectrum 167	Site 17; St. 72; Depth 1350	CTD10 4	59.0991	0.611477	14.9108	11.4377	4.02238	8.38767	2.20896	0.467531	92.7491
Spectrum 172	Site 17; St. 72; Depth 1350	CTD10 4	58.6445	0.570858	15.3762	11.1618	4.23815	8.87357	1.80191	0.450872	93.5045
Spectrum 174	Site 17; St. 72; Depth 1350	CTD10 4	57.685	0.505748	15.8481	10.3713	5.36244	8.9245	1.92228	0.419313	89.0514
Spectrum 175	Site 17; St. 72; Depth 1350	CTD10 4	60.1978	0.806034	14.8145	12.1684	2.78607	7.89822	1.93917	0.608507	91.0563
Spectrum 176	Site 17; St. 72; Depth 1350	CTD10 4	59.7423	0.709034	15.3201	10.97	3.79509	8.31122	1.66006	0.590774	91.7504
Spectrum 183	Site 17; St. 72; Depth 1350	CTD10 4	59.7827	0.654773	14.52	11.8887	3.63114	8.44084	1.7126	0.559921	96.8062
Spectrum 184	Site 17; St. 72; Depth 1350	CTD10 4	59.9044	0.75508	14.1216	12.9278	3.09383	7.6777	2.20249	0.61175	90.5736
Spectrum 185	Site 17; St. 72; Depth 1350	CTD10 4	60.4151	0.638877	16.4676	9.64075	2.82892	7.48634	2.95671	0.531243	86.1604
Spectrum 187	Site 18; St. 73; Depth 725	CTD 11 4	59.3901	0.600613	15.5825	10.7461	4.06725	7.87191	2.15366	0.664121	88.8723
Spectrum 188	Site 18; St. 73; Depth 725	CTD 11 4	59.485	0.684671	14.3463	12.3389	3.33128	8.3124	2.12567	0.611509	92.579
Spectrum 191	Site 18; St. 73; Depth 725	CTD 11 4	58.4928	0.617892	15.1632	11.3863	4.14587	9.09898	1.78914	0.446189	97.1853
Spectrum 194	Site 18; St. 73; Depth 725	CTD 11 4	58.1553	0.639632	15.2759	12.1237	4.06921	8.63049	1.71302	0.607052	91.2744
Spectrum 195	Site 18; St. 73; Depth 725	CTD 11 4	58.3937	0.640246	15.0716	11.7463	3.87015	8.9411	2.0135	0.499817	96.3975
Spectrum 196	Site 18; St. 73; Depth 725	CTD 11 4	59.7214	0.648639	15.4876	10.4428	4.13	8.35248	1.75658	0.50637	95.1501
Spectrum 197	Site 18; St. 73; Depth 725	CTD 11 4	59.3868	0.626898	15.4586	10.3164	4.13063	8.27839	2.04076	0.517363	93.1283
Spectrum 200	Site 18; St. 73; Depth 725	CTD 11 4	59.2724	0.574899	16.0872	9.78246	3.39519	9.13406	2.28178	0.451774	98.6503
Spectrum 201	Site 18; St. 73; Depth 725	CTD 11 4	59.9835	0.772852	15.4062	10.3631	4.47286	7.62088	1.45719	0.682108	97.1241
Spectrum 206	Site 18; St. 73; Depth 725	CTD 11 4	60.3772	0.788934	14.456	11.8259	3.5203	8.20593	1.40251	0.607681	95.1443
Spectrum 209	Site 18; St. 73; Depth 725	CTD 11 4	58.4072	0.680505	15.5008	11.5842	4.37809	8.039	2.09263	0.477753	88.2433
Spectrum 212	Site 18; St. 73; Depth 725	CTD 11 4	58.7697	0.602397	15.2236	11.1492	4.11676	8.46375	2.34259	0.448594	88.6091
Spectrum 214	Site 18; St. 73; Depth 725	CTD 11 4	58.915	0.653553	15.2792	11.749	3.79797	8.60267	1.48954	0.68976	99.5392
Spectrum 216	Site 18; St. 73; Depth 725	CTD 11 4	59.0567	0.668607	15.0024	11.5852	4.00566	8.42771	1.83986	0.574154	92.3084
Spectrum 217	Site 18; St. 73; Depth 725	CTD 11 4	59.1381	0.536774	15.5555	10.6609	4.28696	8.30639	2.16873	0.414344	90.1193
Spectrum 218	Site 18; St. 73; Depth 725	CTD 11 4	60.0505	0.579569	15.4878	11.627	3.11459	8.21899	1.5367	0.549302	92.0991
Spectrum 223	Site 18; St. 73; Depth 725	CTD 11 4	60.0917	0.744785	15.2846	11.0192	3.5078	8.03231	1.83415	0.589041	94.0653
Spectrum 224	Site 18; St. 73; Depth 725	CTD 11 4	58.9859	0.616374	14.6994	11.7105	3.94848	8.68886	2.10295	0.420366	97.4247
Spectrum 225	Site 18; St. 73; Depth 725	CTD 11 4	60.685	0.863449	14.914	11.0337	3.16009	6.88059	3.17145	0.396779	85.0015
Spectrum 234	Site 18; St. 73; Depth 725	CTD 11 4	56.8967	0.703847	14.7384	12.9335	5.25587	8.32315	1.99756	0.446276	97.1665
